# Supplementary material
Source: PubMed Central journal article supplement (PMC9973422)

Supplemental Figure S1

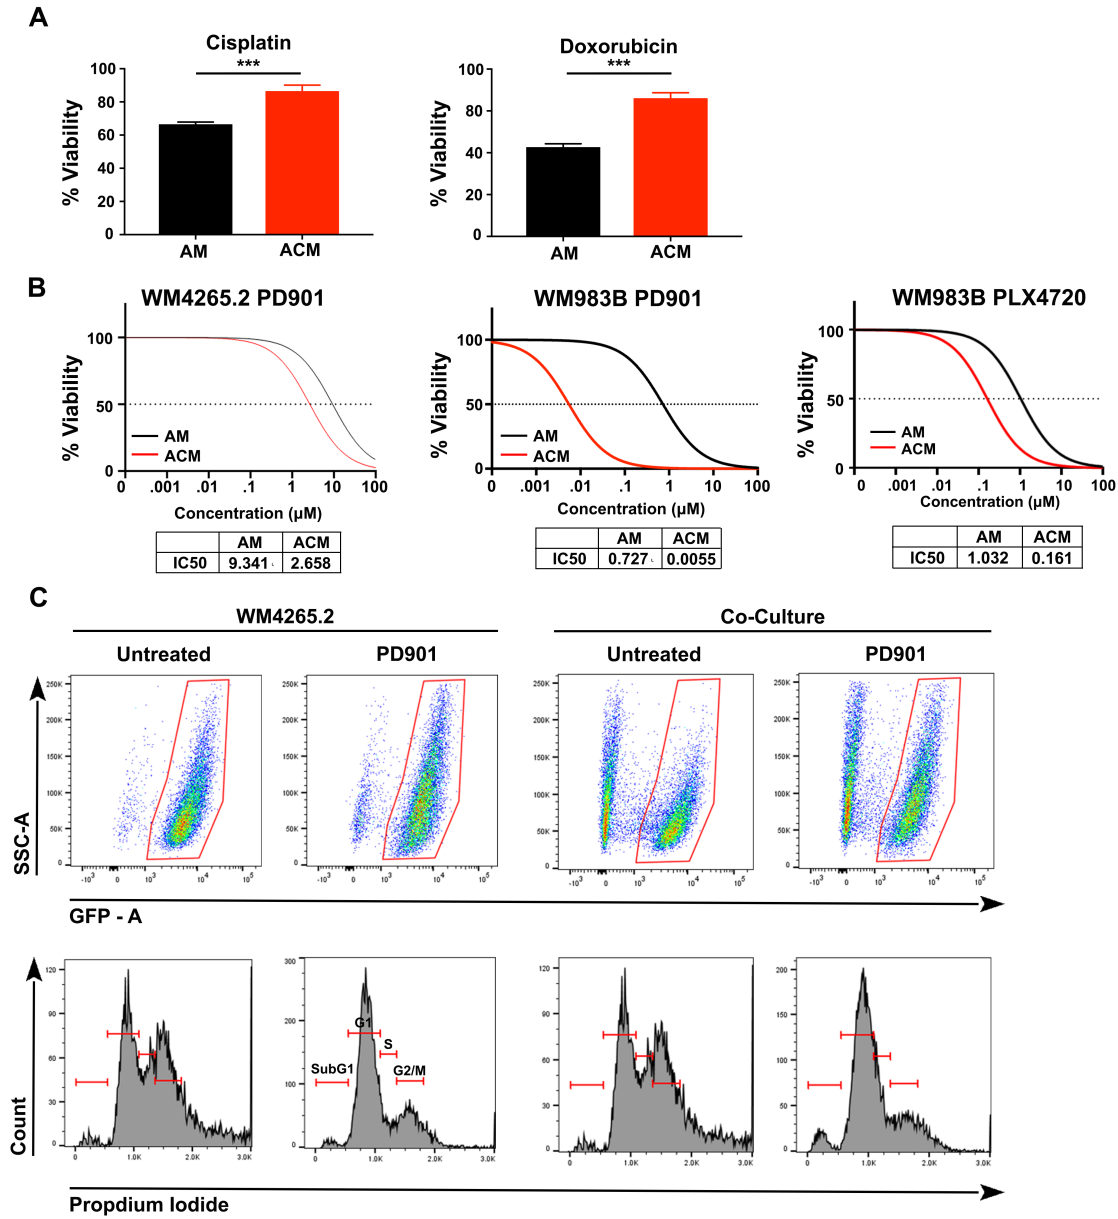

Supplement: crc-21-0033-s02.pdf [file crc-21-0033-s02.pdf]
