# Supplementary material
Source: PubMed Central journal article supplement (PMC9973422)

## Supplemental Figure S2

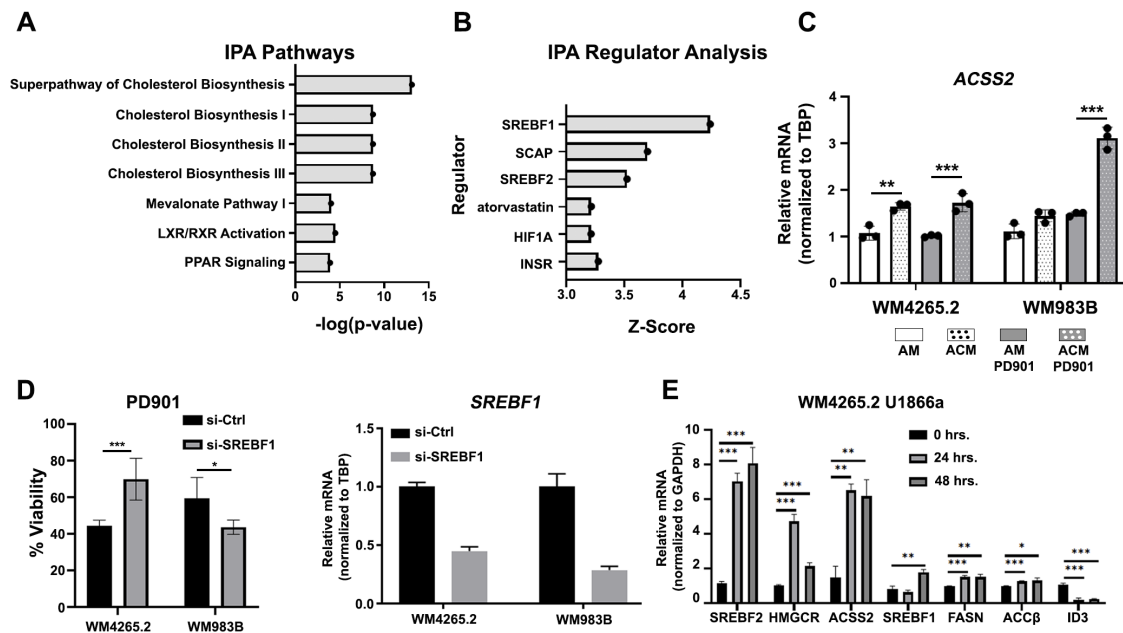

Supplement: crc-21-0033-s03.pdf [file crc-21-0033-s03.pdf]
