# Supplementary material
Source: PubMed Central journal article supplement (PMC9973422)

## Supplemental Figure S3

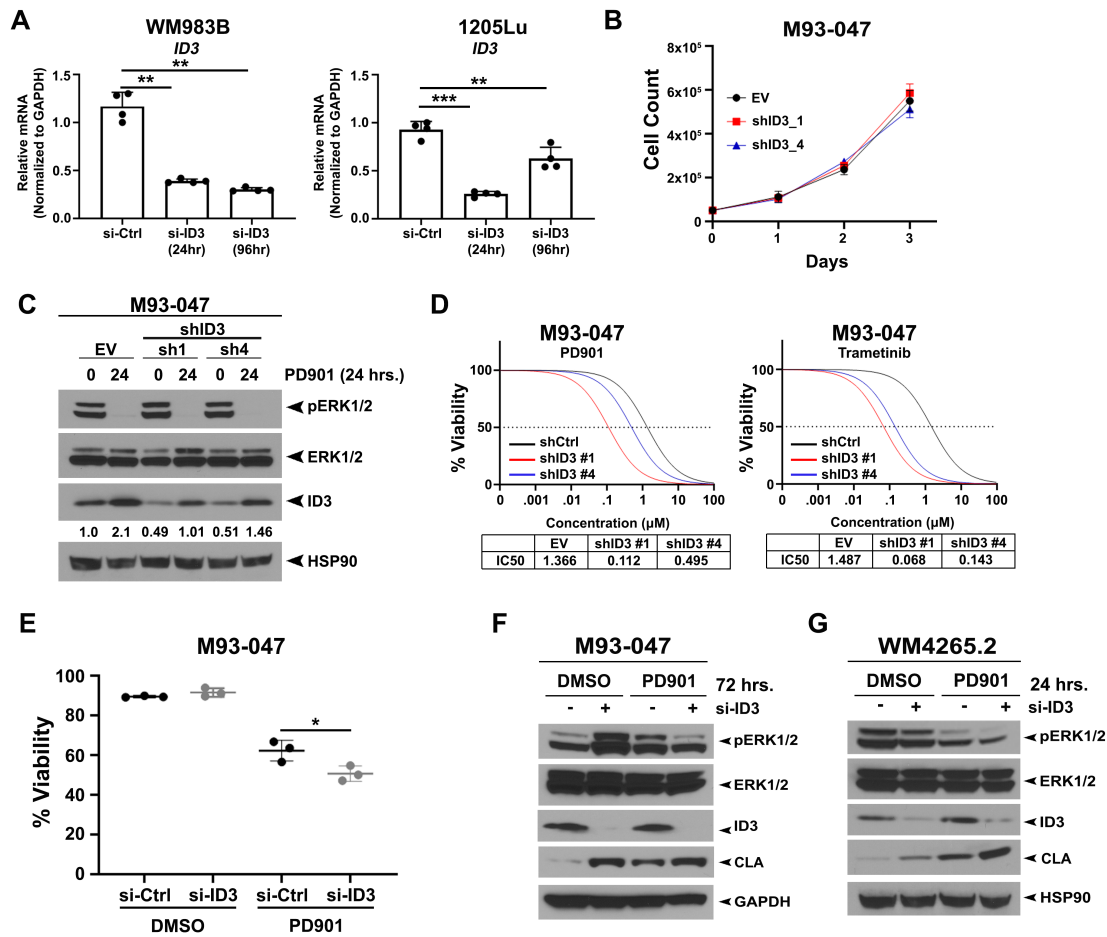

Supplement: crc-21-0033-s04.pdf [file crc-21-0033-s04.pdf]
