# Supplementary material
Source: PubMed Central journal article supplement (PMC9973422)
Supplement: crc-21-0033-s05.pdf [file crc-21-0033-s05.pdf]

Supplemental Figure S4

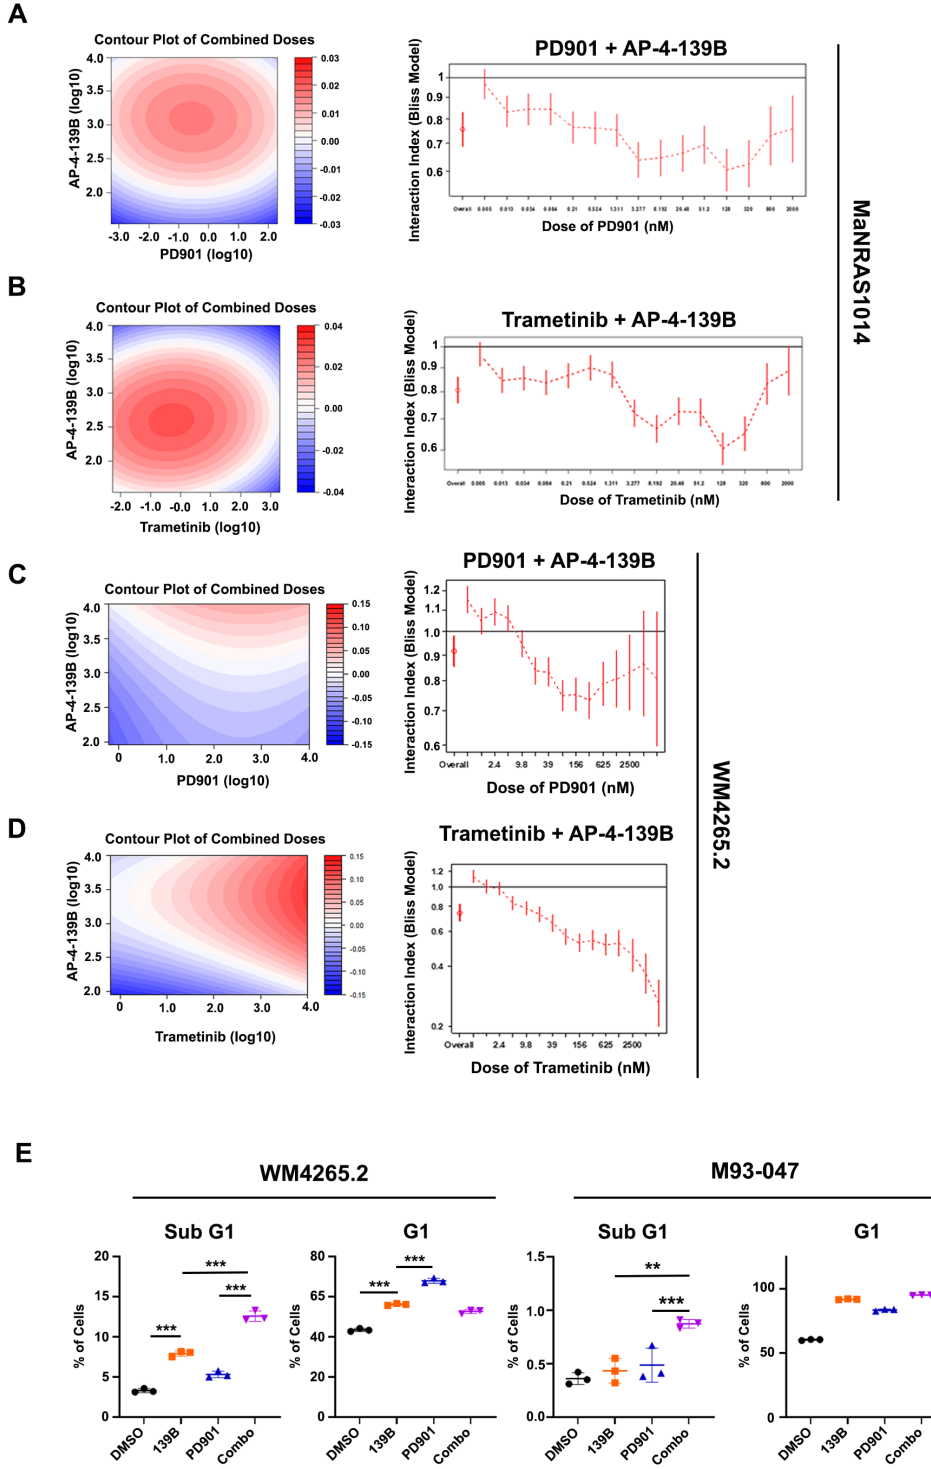

ManRAS1014

WM4265.2
