# Supplementary material
Source: PubMed Central journal article supplement (PMC9973422)

### Supplemental Figure S5

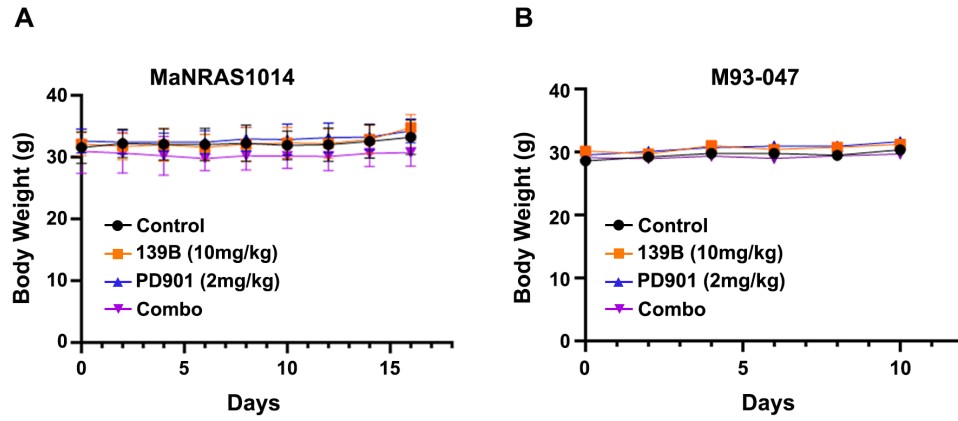

Supplement: crc-21-0033-s06.pdf [file crc-21-0033-s06.pdf]
